# Supplementary material
Source: PubMed Central journal article supplement (PMC5727976)
Supplement: ba008227-suppl1.pdf [file ba008227-suppl1.pdf]

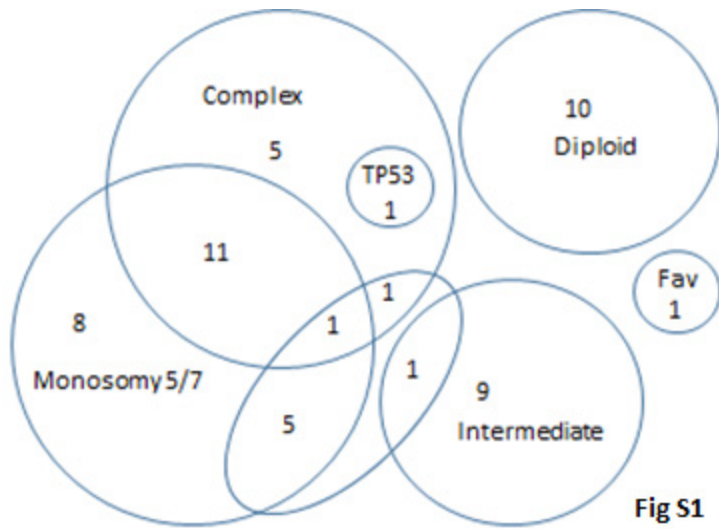

Figure S1: Venn diagram demonstrating cytotypic landscape in the younger ts-AML cohort. Values indicate the number of patients with a particular karyotype. Patients with two or more concurrent karyotypic abnormalities fall under the overlapping regions. N = 51. Abbreviations used: Fav-favorable. Oblong circle represents patients with 3q abnormality; 1 patient had a t(1;3) [intermediate risk].

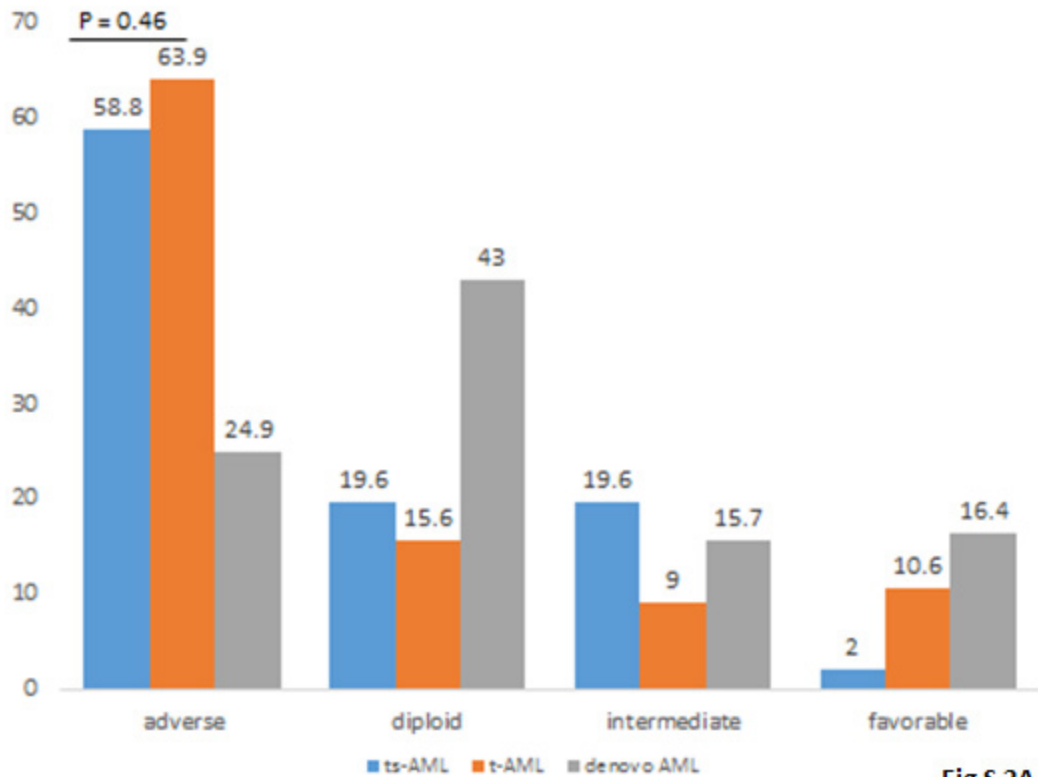

Figure S2A: Frequency karyotype distribution in the ts-AML, t-AML, and denovo AML cohorts in the younger AML cohort.

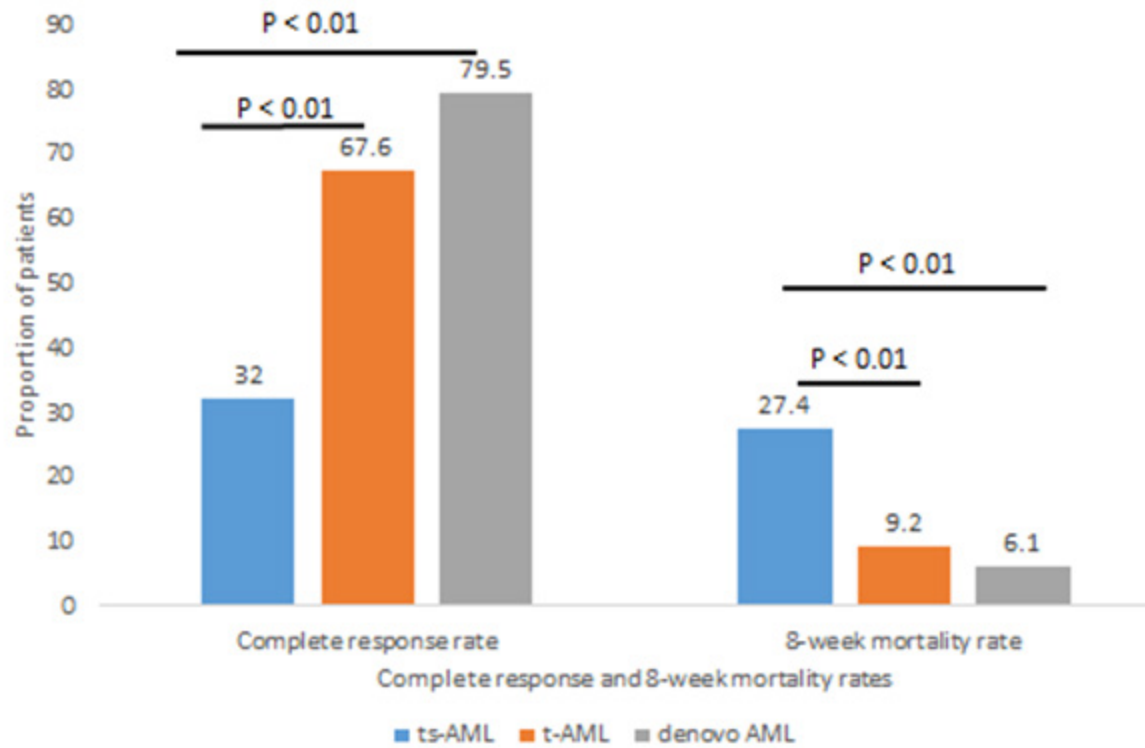**Fig S2B**

Figure S2B: CR and 8-week mortality rates comparing the three cohorts in younger AML: ts-AML, t-AML, and denovo AML.

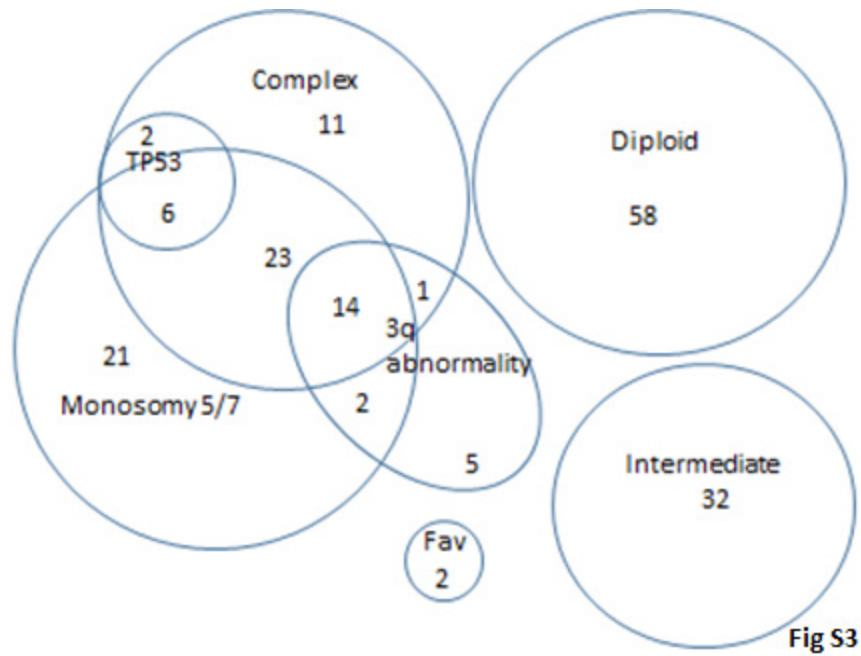

Figure S3: Venn diagram demonstrating cytogenetic landscape in the older ts-AML cohort. Values indicate the number of patients with a particular karyotype. Patients with two or more concurrent karyotypic abnormalities fall under the overlapping regions. N = 179.

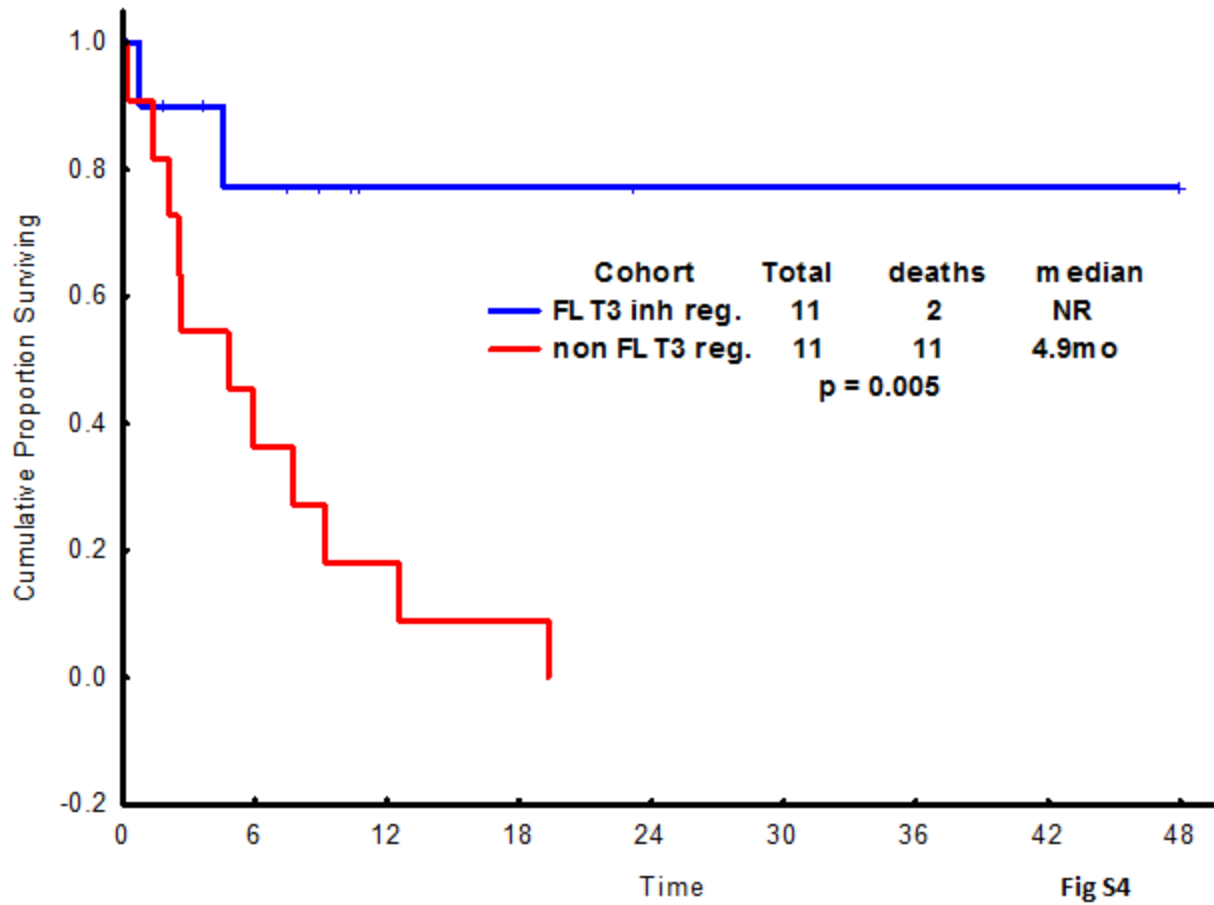

Figure S4: FLT3-ITD ts-AML outcomes by regimen (FLT3 inhibitor inclusive regimen vs. non FLT3-inhibitor regimen). Twenty two of 24 FLT3-ITD patients available for survival analysis.

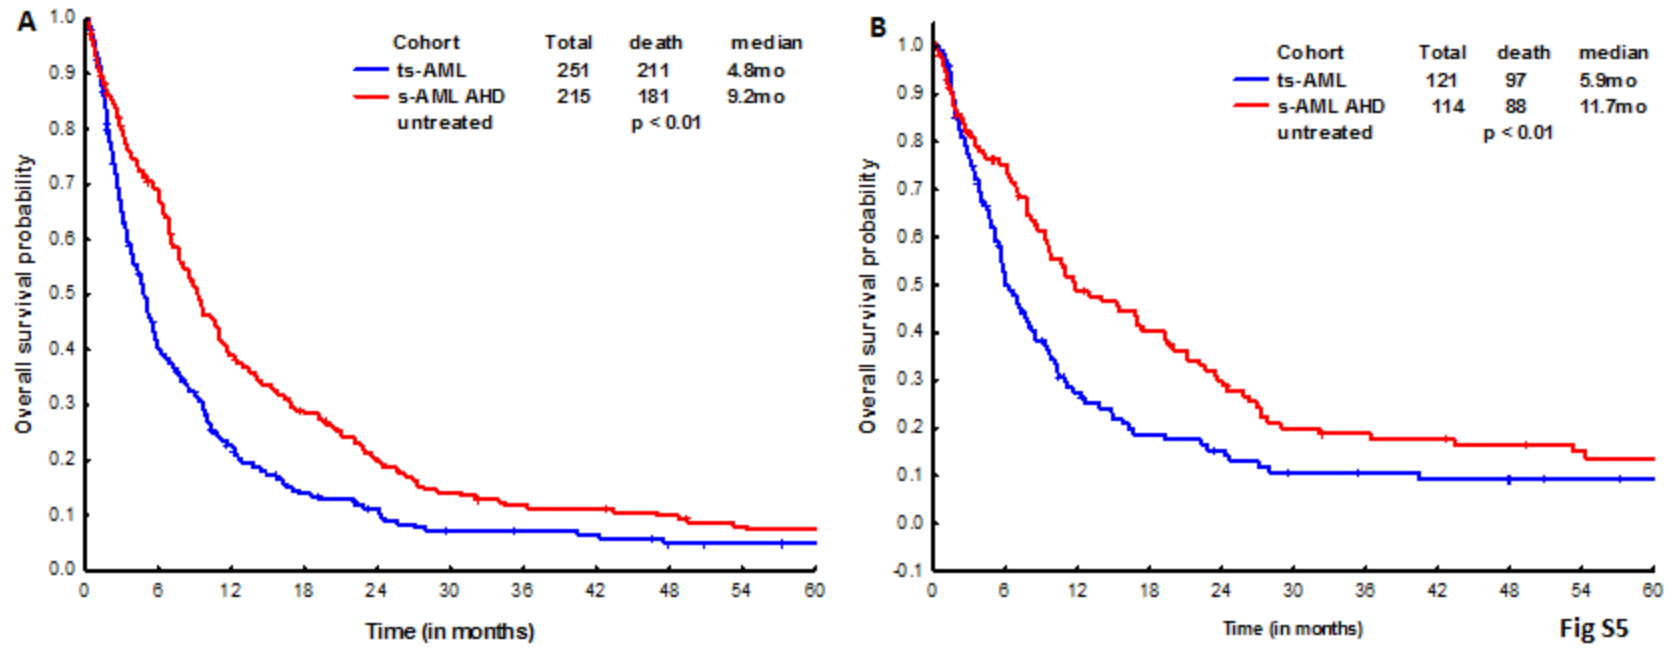

Figure S5: OS in s-AML based on prior treatment of AHD (ts-AML vs s-AML untreated for prior AHD): (A) total population, (B) in AML with non-adverse cytogenetics.

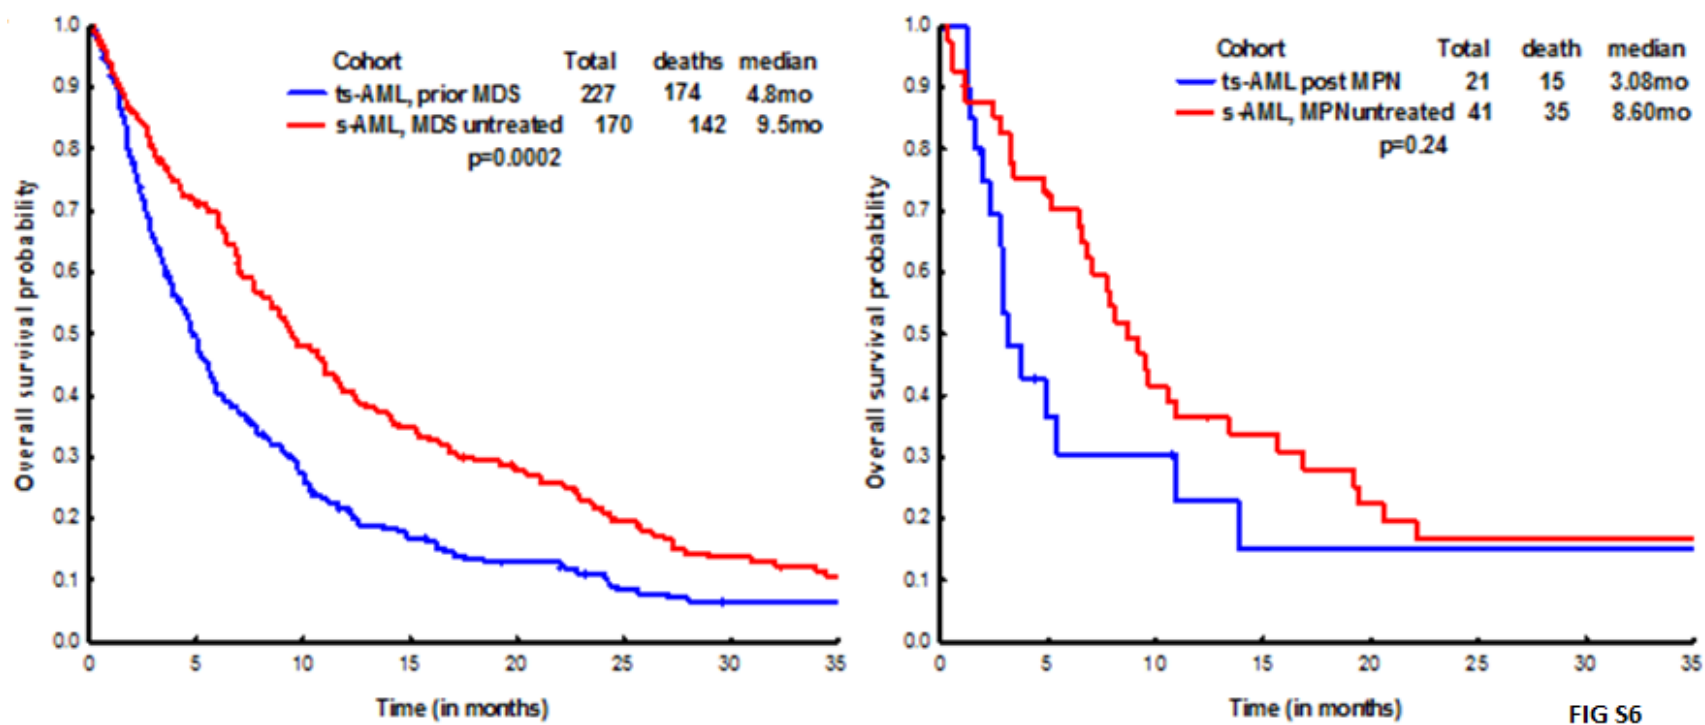

Figure S6: OS by ts-AML status in s-AML based on AHD type (A) prior MDS, (B) prior MPN.

Table S1: Predictors for OS in the overall AML study population

| Variable                              | Univariate survival comparisons |         | Multivariate survival analysis |         |
|---------------------------------------|---------------------------------|---------|--------------------------------|---------|
|                                       | Hazard ratio (95% CI)           | p-value | Hazard ratio (95% CI)          | p-value |
| Age (≥60)                             | 2.4 (2.2-2.6)                   | <0.001  | 1.87 (1.53-2.28)               | <0.001  |
| FLT3                                  | 1.3 (1.02-1.6)                  | <0.001  | 1.31 (1.06-1.62)               | 0.012   |
| NPM1                                  | 0.7 (0.6-0.8)                   | <0.001  | 0.80 (0.65-0.99)               | 0.044   |
| RAS                                   | 0.8 (0.7-0.97)                  | 0.023   | 1.02 (0.83-1.26)               | 0.82    |
| Ts-AML                                | 2.2 (1.9-2.5)                   | <0.001  | 2.1 (1.68-2.71)                | <0.001  |
| s-AML, AHD untreated                  | 1.4 (1.2-1.6)                   | <0.001  | 1.45 (1.14-1.83)               | 0.002   |
| High/intermediate anthracycline based | 0.6 (0.5-0.6)                   | <0.001  | 0.71 (0.59-0.85)               | <0.001  |
| Adverse cytogenetics                  | 2.5 (2.3-2.8)                   | <0.001  | 2.56 (2.18-3.00)               | <0.001  |
| WBC (≥10K/microL)                     | 0.99 (0.9-1.1)                  | 0.83    | -                              | -       |
| Platelet (≥50K/microL)                | 0.8 (0.7-0.9)                   | <0.001  | 0.78 (0.68-0.89)               | <0.001  |
| BM Blasts (≥30%)                      | 0.91 (0.83-1.0)                 | 0.057   | 1.24 (1.06-1.46)               | 0.007   |
| t-AML                                 | 1.7 (1.5-1.9)                   | <0.001  | 1.35 (1.13-1.60)               | 0.001   |

Abbreviations used: CR: complete response. WBC-white blood cell count. BM-bone marrow. S-AML-secondary AML. Ts-AML-treated secondary AML. AHD-antecedent hematological disorder. T-AML-therapy related AML. MDS-myelodysplastic syndrome. Gp-group.
